# Supplementary material for: Cadherin-11 Regulates Motility in Normal Cortical Neural Precursors and Glioblastoma
Source: PubMed Central journal article supplement (PMC3737231; doi:10.1371/journal.pone.0070962), 2013-08-07

Fig. S6

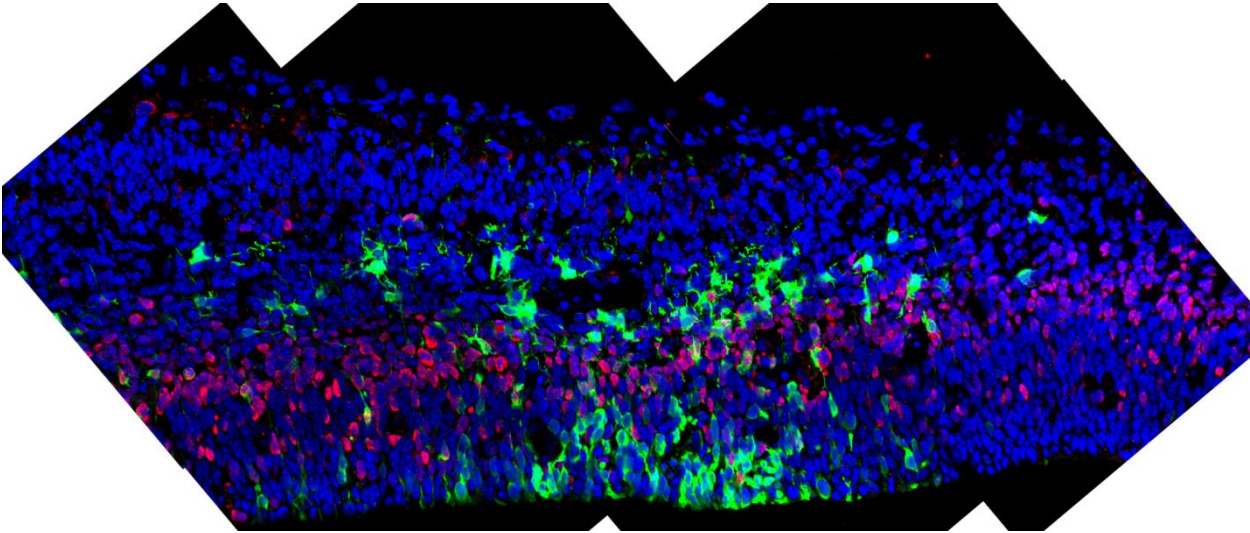

Supplement: pone.0070962.s006.pdf [file pone.0070962.s006.pdf]
