# Supplementary material for: Cadherin-11 Regulates Motility in Normal Cortical Neural Precursors and Glioblastoma
Source: PubMed Central journal article supplement (PMC3737231; doi:10.1371/journal.pone.0070962), 2013-08-07
Supplement: pone.0070962.s010.pdf [file pone.0070962.s010.pdf]

# Comparison of Selected Genes in Liang Brain

## Over-expression in Glioblastoma vs Normal

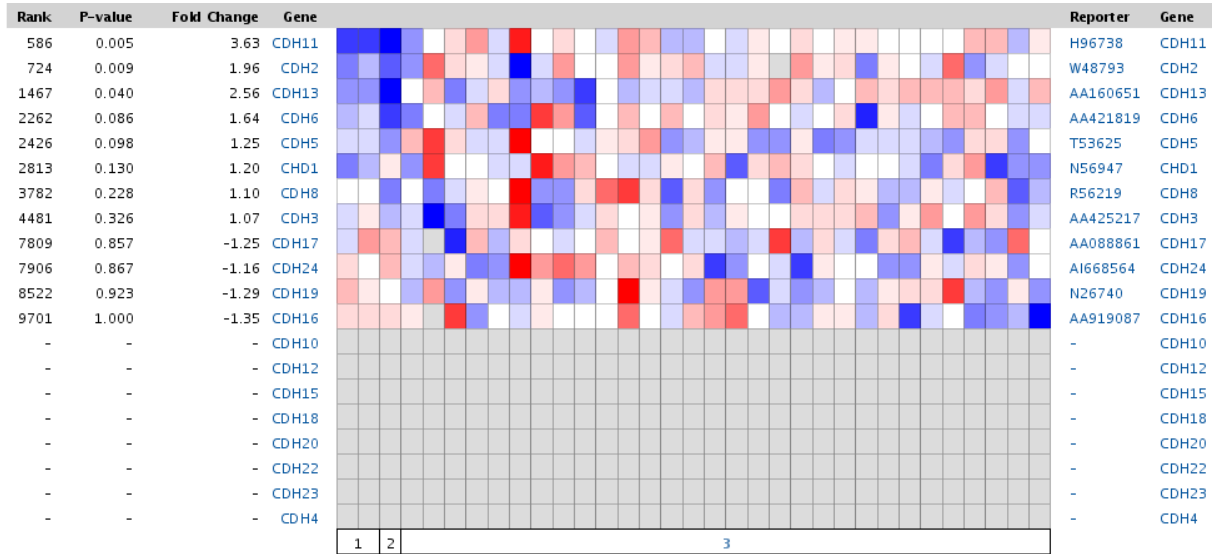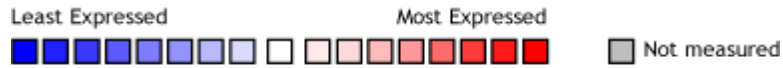

Note: Colors are z-score normalized to depict relative values within rows. They cannot be used to compare values between rows.

### Legend

1. Brain (2) 2. Cerebellum (1) 3. Glioblastoma (30)

Proc Natl Acad Sci U S A 2005/04/19

38 samples

mRNA

9,957 measured genes

Platform not pre-defined in Oncomine

# Comparison of Selected Genes in Bredel Brain 2

Over-expression in Glioblastoma vs Normal

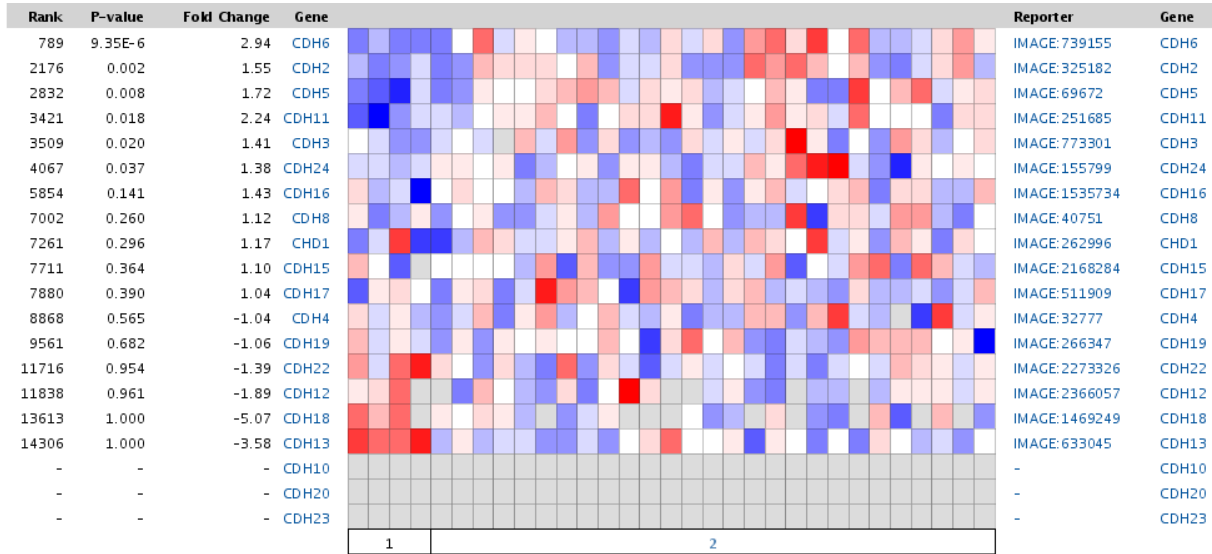

Least Expressed Most Expressed Not measured

Note: Colors are z-score normalized to depict relative values within rows. They cannot be used to compare values between rows.

## Legend

1. Brain (4) 2. Glioblastoma (27)

Cancer Res 2005/10/01

54 samples

mRNA

14,836 measured genes

Platform not pre-defined in OncoPrint

# Comparison of Selected Genes in Liang Brain

Over-expression in Glioblastoma vs Normal

| Rank | P-value | Fold Change | Gene  | Reporter | Gene  |
|------|---------|-------------|-------|----------|-------|
| 586  | 0.005   | 3.63        | CDH11 | H96738   | CDH11 |
| 724  | 0.009   | 1.96        | CDH2  | W48793   | CDH2  |
| 1467 | 0.040   | 2.56        | CDH13 | AA160651 | CDH13 |
| 2262 | 0.086   | 1.64        | CDH6  | AA421819 | CDH6  |
| 2426 | 0.098   | 1.25        | CDH5  | T53625   | CDH5  |
| 2813 | 0.130   | 1.20        | CHD1  | N56947   | CHD1  |
| 3782 | 0.228   | 1.10        | CDH8  | R56219   | CDH8  |
| 4481 | 0.326   | 1.07        | CDH3  | AA425217 | CDH3  |
| 7809 | 0.857   | -1.25       | CDH17 | AA088861 | CDH17 |
| 7906 | 0.867   | -1.16       | CDH24 | A1668564 | CDH24 |
| 8522 | 0.923   | -1.29       | CDH19 | N26740   | CDH19 |
| 9701 | 1.000   | -1.35       | CDH16 | AA919087 | CDH16 |
| -    | -       | -           | CDH10 | -        | CDH10 |
| -    | -       | -           | CDH12 | -        | CDH12 |
| -    | -       | -           | CDH15 | -        | CDH15 |
| -    | -       | -           | CDH18 | -        | CDH18 |
| -    | -       | -           | CDH20 | -        | CDH20 |
| -    | -       | -           | CDH22 | -        | CDH22 |
| -    | -       | -           | CDH23 | -        | CDH23 |
| -    | -       | -           | CDH4  | -        | CDH4  |

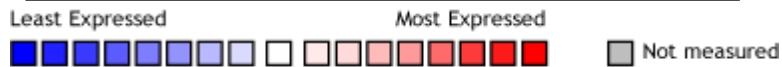

Note: Colors are z-score normalized to depict relative values within rows. They cannot be used to compare values between rows.

## Legend

1. Brain (2) 2. Cerebellum (1) 3. Glioblastoma (30)

Proc Natl Acad Sci U S A 2005/04/19

38 samples

mRNA

9,957 measured genes

Platform not pre-defined in OncoPrint
